# Supplementary material for: Functionalization of gold nanoparticles with two aminoalcohol-based quinoxaline derivatives for targeting phosphoinositide 3-kinases (PI3Kα)
Source: Royal Society of Chemistry journal article supplement (doi:10.1039/c8nj04314k), 2018-12-17
Supplement: c8nj04314k1.pdf [file c8nj04314k1.pdf]

## Supporting Information

### **Functionalization of gold nanoparticles with two aminoalcohol-based quinoxaline derivatives for targeting phosphoinositide 3-kinases (PI3K $\alpha$ ).**

Janine Araújo<sup>1</sup>, Fabrício G. Menezes<sup>1</sup>, Heloiza F. O. Silva<sup>1</sup>, Davi S. Vieira<sup>1</sup>, Sergio R. B. Silva<sup>1</sup>, Adailton J. Bortoluzzi<sup>2</sup>, Jannyely M. Neri<sup>1</sup>, Celso Sant'Anna<sup>3</sup>, Mateus Eugenio<sup>3</sup>, Luiz H. S. Gasparotto<sup>1\*</sup>

<sup>1</sup>Biological Chemistry and Chemometrics Research Group, Institute of Chemistry, Federal University of Rio Grande do Norte, Lagoa Nova, 59072-970, Natal, RN, Brazil.

<sup>2</sup>Laboratório de Bioinorgânica e Cristalografia, Departamento de Química, Universidade Federal de Santa Catarina, 88040-900 Florianópolis-SC, Brazil.

<sup>3</sup>Laboratory of Microscopy Applied to Life Science - Lamav, National Institute of Metrology, Quality and Technology – Inmetro, Duque de Caxias, 25250-020, Rio de Janeiro, RJ, Brazil.

\*corresponding author: [lhgasparotto@ufrnet.br](mailto:lhgasparotto@ufrnet.br)

## X-Ray crystallography

A prismatic colorless crystal with dimensions of 0.32 x 0.24 x 0.18 mm<sup>3</sup> was selected from a crystalline sample of the compound OAQX for crystallographic analysis. X-ray diffraction data were measured on a Kappa APEXII Duo diffractometer. The frames were recorded with  $\omega$  and  $\phi$  scans. Collected intensities were corrected for Lorentz and polarization effects. No absorption correction was applied to measured data. The structure was solved by direct methods and refined by full-matrix least-squares methods using SIR97<sup>1</sup> and SHELXL97<sup>2</sup> programs, respectively. All non-hydrogen atoms were refined anisotropically. H atoms attached to C atoms were placed at their idealized positions, with C-H distances and  $U_{eq}$  values taken from the default settings of the refinement program. H atom of the alcohol group was found from Fourier difference map and refined isotropically as free atom. Ortep plot was drawn using PLATON<sup>3</sup> software. Selected crystallographic data are shown in Table 1 and full crystallographic tables for compound OAQX have been deposited with the Cambridge Crystallographic Data Centre as supplementary publication number CCDC 1038640. These data can be obtained free of charge from The Cambridge Crystallographic Data Centre via [www.ccdc.cam.ac.uk/data\\_request/cif](http://www.ccdc.cam.ac.uk/data_request/cif).

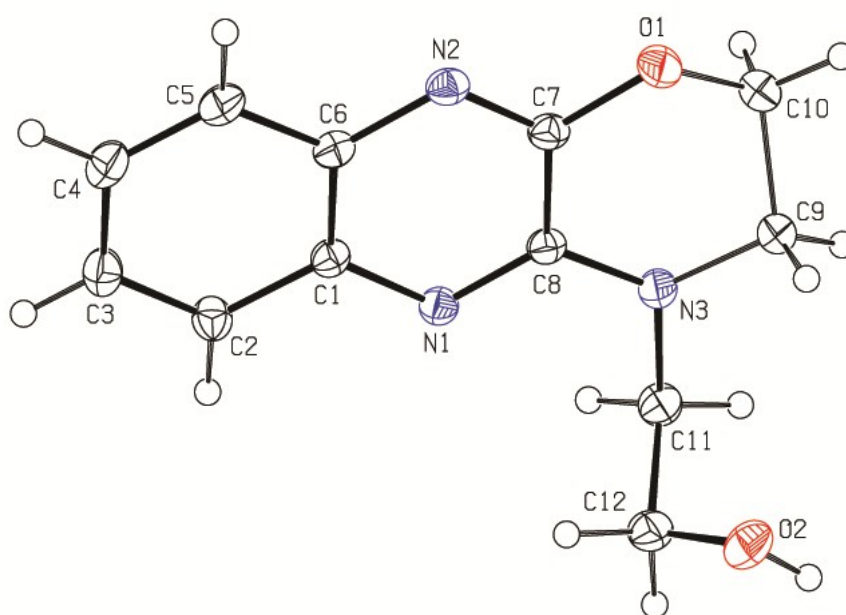

**Table 1.** Crystal data and structure refinement for compound OAQX.

---

|                                   |                                                                           |
|-----------------------------------|---------------------------------------------------------------------------|
| Empirical formula                 | C <sub>12</sub> H <sub>13</sub> N <sub>3</sub> O <sub>2</sub>             |
| Formula weight                    | 231.25                                                                    |
| Temperature                       | 173(2) K                                                                  |
| Wavelength                        | 0.71073 Å                                                                 |
| Crystal system                    | Monoclinic                                                                |
| Space group                       | P 2 <sub>1</sub> /n                                                       |
| Unit cell dimensions              | a = 10.1217(2) Å<br>b = 9.5662(2) Å<br>c = 11.2210(3) Å<br>β = 98.633(2)° |
| Volume                            | 1074.18(4) Å <sup>3</sup>                                                 |
| Z                                 | 4                                                                         |
| Density (calculated)              | 1.430 Mg/m <sup>3</sup>                                                   |
| Absorption coefficient            | 0.101 mm <sup>-1</sup>                                                    |
| F(000)                            | 488                                                                       |
| Crystal size                      | 0.32 x 0.24 x 0.18 mm <sup>3</sup>                                        |
| Theta range for data collection   | 2.53 to 33.21°                                                            |
| Index ranges                      | -15 ≤ h ≤ 15, -13 ≤ k ≤ 14, -17 ≤ l ≤ 10                                  |
| Reflections collected             | 9418                                                                      |
| Independent reflections           | 4090 (R <sub>int</sub> = 0.0175)                                          |
| Refinement method                 | Full-matrix least-squares on F <sup>2</sup>                               |
| Data / restraints / parameters    | 4090 / 0 / 173                                                            |
| Goodness-of-fit on F <sup>2</sup> | 1.054                                                                     |
| Final R indices [I > 2σ(I)]       | R1 = 0.0430, wR2 = 0.1264                                                 |
| R indices (all data)              | R1 = 0.0530, wR2 = 0.1357                                                 |
| Largest diff. peak and hole       | 0.458 and -0.199 e.Å <sup>-3</sup>                                        |

---

## References

1. Altomare, A.; Burla, M. C.; Camalli, M.; Cascarano, G. L.; Giacovazzo, C.; Guagliardi, A.; Moliterni, A. G. G.; Polidori, G.; Spagna, R. *J. Appl. Crystallogr.* **1999**, *32*, 115.
2. Herbst-Irmer, R.; Sheldrick, G. M.; *Acta Crystallogr., Sect. B: Struct. Sci.* **1998**, *54*, 443.
3. Spek, A. L.; *J. Appl. Crystallogr.* **2003**, *36*, 7.
